# Supplementary material
Source: ML conference proceedings conference paper supplement (https://openaccess.thecvf.com/content/WACV2025/html/Nagaonkar_When_Visual_State_WACV_2025_paper.html)
Supplement: Supplementary file 1 [file Nagaonkar_When_Visual_State_WACV_2025_supplemental.pdf]

# supplementary: When Visual State Space Model Meets Backdoor Attacks

Sankalp Nagaonkar

IIT Dharwad

210020031@iitdh.ac.in

Achyut Mani Tripathi

IIT Dharwad

t.achyut@iitdh.ac.in

Ashish Mishra

HPE lab, Bangalore

mishraashish632@gmail.com

## 1. Ablation Analysis

- To demonstrate the effectiveness of our proposed approach beyond image datasets, we conducted experiments on the EPIC audio dataset, as shown in Table 6. The results indicate that our backdoor attack methods are effective not only on image datasets but also on audio datasets.
- We also tested various versions of the VMamba model, including Mqamba-in-Mamba (Mim) [1] and Eff-Mamba [2], across both the CIFAR-10 and ImageNet-1K datasets. These experiments confirm that our proposed backdoor attacks are effective across different Mamba model variants. The results are detailed in Table 2 for CIFAR-10 and Table 3 for ImageNet-1K.
- Additionally, we conducted an ablation study to assess the impact of varying the number of swapped rows and columns in our approach. We experimented with 80, 100, and 150 swapped rows and columns, with results presented in Table 5.
- Furthermore, we evaluated the efficacy of the proposed method under All-to-One attacks for the ImageNet-1K dataset. The results are provided in Table 1.
- Table 7 illustrates the creation time of backdoored images for different attacks. The BadNets attack requires the shortest time, while the WaNet attack demands the most time. The time required by the proposed four attacks is comparable to that of the R-Fool attack.
- To better understand the impact of the attack on clean images, we extracted and visualized the layer-wise attention maps for both clean and attacked images in Figures 1 and 2, respectively. We observed that, for clean images, the model focuses on relevant features associated with the class. In contrast, for attacked images, the model tends to focus on irrelevant parts, which misleads the model.

| Dataset     | Source/Target Pair                                             | Attack                 | Model           | PMA  | ASR   |
|-------------|----------------------------------------------------------------|------------------------|-----------------|------|-------|
| ImageNet-1K | Source: "Warplane", "Computer", "Bedroom"<br>Target: Speedboat | S-QRDBA: Both Swap-100 | ResNet-18       | 79.8 | 78    |
|             |                                                                |                        | ResNet-50       | 79   | 89.8  |
|             |                                                                |                        | MLP-mixer       | 71.3 | 60    |
|             |                                                                |                        | ViT             | 75   | 71.22 |
|             |                                                                |                        | VMamba          | 68   | 58    |
|             |                                                                |                        | Mamba in Mamba  | 89   | 78    |
|             |                                                                |                        | Efficient Mamba | 88.7 | 76.2  |

Table 1. Performance Metrics for Different Models on Imagenet with Various Source/Target Pairs(All-to-One setup)

| Source/Target   | $\alpha$ | Model         | Dataset | PMA  | ASR  |
|-----------------|----------|---------------|---------|------|------|
| class 3/class 6 | 0.1      | Mim [1]       | cifar10 | 67.3 | 33.4 |
|                 |          | Eff-Mamba [2] |         | 68   | 54   |
|                 | 0.15     | Mim           |         | 60   | 70   |
|                 |          | Eff-Mamba [2] |         | 63   | 44   |
|                 | 0.2      | Mim           |         | 66   | 62.6 |
|                 |          | Eff-Mamba [2] |         | 72.8 | 62.8 |

Table 2. CMA and ASR for Different version of Vmamba Models and  $\alpha$  Values on CIFAR-10 Using W-QRDBA Attack

| Source/Target      | $\alpha$ | Dataset  | Model         | PMA  | ASR  |
|--------------------|----------|----------|---------------|------|------|
| warplane/speedboat | 0.1      | Imagenet | Mim           | 84   | 30.4 |
|                    |          |          | Eff-Mamba [2] | 83   | 35   |
|                    | 0.15     |          | Mim           | 82.5 | 50   |
|                    |          |          | Eff-Mamba [2] | 80   | 40   |
|                    | 0.2      |          | Mim           | 80   | 69   |
|                    |          |          | Eff-Mamba [2] | 77.3 | 60   |

Table 3. CMA and ASR for Different version of Vmamba Models and  $\alpha$  Values on Imagenet Using W-QRDBA Attack

| Source/Target      | Attack  | Model         | Dataset  | PMA  | ASR |
|--------------------|---------|---------------|----------|------|-----|
| warplane/speedboat | BadNets | Mim           | Imagenet | 84.5 | 27  |
|                    |         | Eff-Mamba [2] |          | 78.4 | 35  |
|                    | R-Fool  | Mim           |          | 84.3 | 50  |
|                    |         | Eff-Mamba [2] |          | 78   | 40  |
|                    | WaNet   | Mim           |          | 82   | 37  |
|                    |         | Eff-Mamba [2] |          | 77   | 35  |

Table 4. CMA and ASR for Different Attacks and Models on Imagenet-1K

| Source/Target      | No. of Swapped Rows | Model     | Dataset     | CMA   | PMA | ASR  |
|--------------------|---------------------|-----------|-------------|-------|-----|------|
| Warplane/Speedboat | 80                  | ResNet-18 | Imagenet-1K | 90.53 | 94  | 68.8 |
|                    |                     | ResNet-50 |             | 88    | 87  | 64   |
|                    |                     | ViT       |             | 77.8  | 77  | 46.8 |
|                    |                     | VMamba    |             | 86.94 | 74  | 40   |
|                    |                     | MLP-mixer |             | 99.47 | 75  | 38.8 |
|                    | 100                 | ResNet-18 |             | 91.88 | 90  | 74.8 |
|                    |                     | ResNet-50 |             | 88.94 | 90  | 83.8 |
|                    |                     | ViT       |             | 73.94 | 70  | 54   |
|                    |                     | VMamba    |             | 86.7  | 75  | 49.2 |
|                    |                     | MLP-mixer |             | 99.8  | 87  | 40   |
|                    | 150                 | ResNet-18 |             | 91    | 90  | 96.2 |
|                    |                     | ResNet-50 |             | 91.65 | 88  | 96.2 |
|                    |                     | ViT       |             | 85.65 | 76  | 78.8 |
|                    |                     | VMamba    |             | 89.61 | 76  | 40   |
|                    |                     | MLP-mixer |             | 100   | 87  | 80.8 |

Table 5. Performance Metrics for Several Models for Different Number of Swapped Rows on Imagenet-1K Using S-QRDBA (Both Attack)

| Dataset | Source/Target Pair                                | Attack                   | Model     | PMA  | ASR  |
|---------|---------------------------------------------------|--------------------------|-----------|------|------|
| EPIC    | "Scrub, Scrape, Scour, Wipe / Tap Opening, Water" | Badnet                   | ResNet-18 | 62.1 | 61.2 |
|         |                                                   |                          | ResNet-50 | 62.5 | 72.7 |
|         |                                                   |                          | MLP-mixer | 75.7 | 94.5 |
|         |                                                   |                          | ViT       | 78.6 | 87.1 |
|         |                                                   |                          | VMamba    | 73.7 | 70   |
|         |                                                   |                          | MiM       | 78.1 | 28.5 |
|         |                                                   |                          | EF-Mamba  | 73.6 | 71   |
|         |                                                   | WaNet                    | ResNet-18 | 72.2 | 63.9 |
|         |                                                   |                          | ResNet-50 | 60.1 | 77.1 |
|         |                                                   |                          | MLP-mixer | 78.2 | 81.3 |
|         |                                                   |                          | ViT       | 77.6 | 55.8 |
|         |                                                   |                          | VMamba    | 70   | 50   |
|         |                                                   |                          | MiM       | 72.4 | 38.8 |
|         |                                                   |                          | EF-Mamba  | 70   | 40   |
|         |                                                   | R-Fool                   | ResNet-18 | 60   | 71.5 |
|         |                                                   |                          | ResNet-50 | 55.4 | 91.7 |
|         |                                                   |                          | MLP-mixer | 77.8 | 93.6 |
|         |                                                   |                          | ViT       | 75.5 | 80.7 |
|         |                                                   |                          | VMamba    | 71.5 | 60.2 |
|         |                                                   |                          | MiM       | 80.3 | 66   |
|         |                                                   |                          | EF-Mamba  | 72   | 79.4 |
|         |                                                   | S-QRDBA (both swap): 100 | ResNet-18 | 68   | 90   |
|         |                                                   |                          | ResNet-50 | 64   | 95   |
|         |                                                   |                          | MLP-mixer | 75   | 96   |
|         |                                                   |                          | ViT       | 73.2 | 92   |
|         |                                                   |                          | VMamba    | 75   | 96   |
|         |                                                   |                          | MiM       | 80   | 93   |
|         | EF-Mamba                                          | 84.5                     | 95        |      |      |

Table 6. Performance of The Proposed Attack on Audio Dataset

| Attacks               | Variation             | Time (Seconds) |
|-----------------------|-----------------------|----------------|
| S-QRDBA (Both)        | 80 Rows, 80 Columns   | 0.024          |
|                       | 100 Rows, 100 Columns | 0.028          |
|                       | 150 Rows, 150 Columns | 0.0284         |
| S-QRDBA (Row Swap)    | 80 Row                | 0.0227         |
|                       | 100 Rows              | 0.0241         |
|                       | 150 Rows              | 0.0259         |
| S-QRDBA (Column Swap) | 80 columns            | 0.0226         |
|                       | 100 Columns           | 0.025          |
|                       | 150 Columns           | 0.0263         |
| W-QRDBA               | $\alpha = 0.1$        | 0.0253         |
|                       | $\alpha = 0.15$       | 0.025          |
|                       | $\alpha = 0.2$        | 0.027          |
| Wanet                 | -                     | 0.5325         |
| R-Fool                | -                     | 0.01187        |
| BadNets               | -                     | 0.0000057      |

Table 7. Table with running time analysis

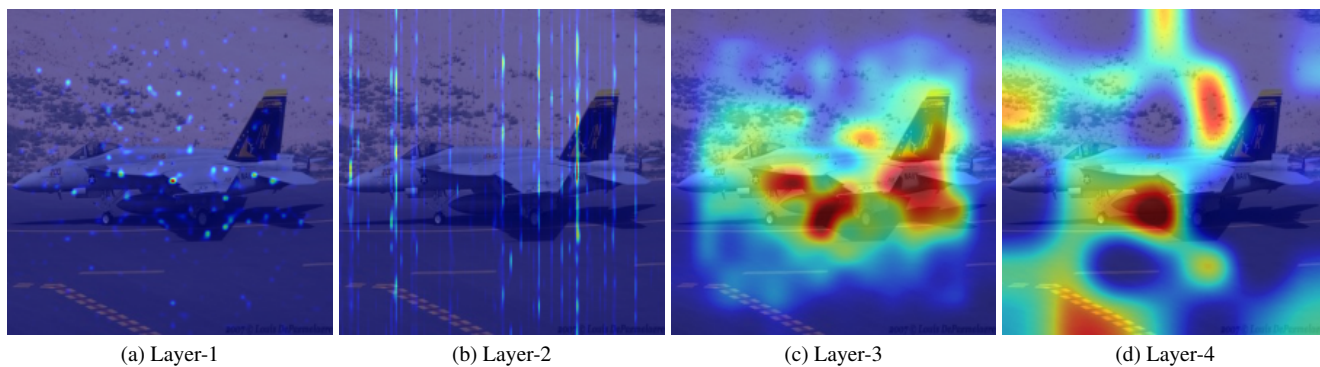

Figure 1. Layer-wise attention map visualization for cleaned image

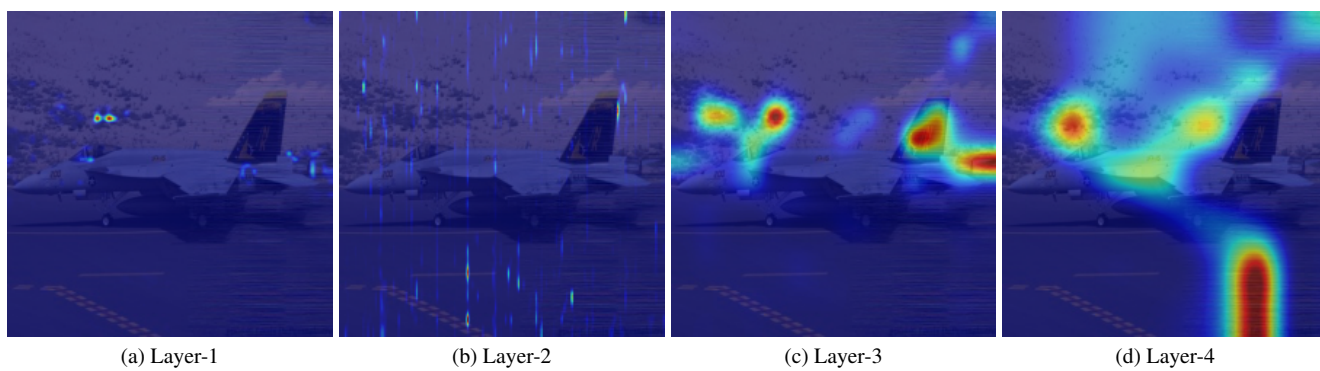

Figure 2. Layer-wise attention map visualization for attacked image

## References

- [1] Tianxiang Chen, Zhentao Tan, Tao Gong, Qi Chu, Yue Wu, Bin Liu, Jieping Ye, and Nenghai Yu. Mim-istd: Mamba-in-mamba for efficient infrared small target detection. *arXiv preprint arXiv:2403.02148*, 2024. [1](#), [2](#)
- [2] Xiaohuan Pei, Tao Huang, and Chang Xu. Efficientvmamba: Atrous selective scan for light weight visual mamba. *arXiv preprint arXiv:2403.09977*, 2024. [1](#), [2](#)
